# 1      **Discovery of the Quiescent Body that Functions as a Biological** 2      **Timer for Growth Resumption of Non-growing Bacterial Cells**

3  
4                      Jiayu Yu<sup>1†</sup>, Yang Liu<sup>1†</sup> & Zengyi Chang<sup>1,2,\*</sup>  
5

6      <sup>1</sup>The State Key Laboratory of Protein and Plant Gene Research, School of Life  
7      Sciences, Peking University, Beijing 100871, P.R. China

8      <sup>2</sup>Center for Protein Science, Peking University, Beijing 100871, P.R. China

9      <sup>†</sup>J.Y. and Y.L. contributed equally to this work

10     <sup>\*</sup>Correspondence: [changzy@pku.edu.cn](mailto:changzy@pku.edu.cn) (Z.C.)  
11

## 12     **Abstract**

13             **Bacterial cells in natural environment often exist in a non-growing state.**  
14     **They recover after a short or long lag time when encountering a**  
15     **growth-supportive condition. Such dormant bacteria are known for their high**  
16     **tolerance towards adverse conditions such as the presence of antibiotics and are**  
17     **thus viewed as a great challenge for the treatment of infectious diseases.**  
18     **Nevertheless, it remains poorly understood on how bacterial cells enter such an**  
19     **inert state and why a heterogeneous lag time is taken before they could recover.**  
20     **In this study, we accidentally discovered a subcellular structure that we term**  
21     **quiescent body, which is formed in the non-growing/non-dividing**  
22     **stationary-phase *E. coli* cells and selectively sequesters many proteins essential**  
23     **for cell growth, division and metabolism. This finding was made when we tried**  
24     **to trace the status of FtsZ, an essential protein for bacterial cytokinesis, via *in***  
25      ***vivo* protein photo-crosslinking and live-cell fluorescence microscopic imaging.**  
26     **We further demonstrated the following. 1. Formation of quiescent bodies can be**  
27     **induced by indole and relies on the occurrence of cellular respiration. 2. When**  
28     **the non-growing cells are placed in fresh culture medium, the quiescent bodies**  
29     **will initiate their dissolution in cells that have started to re-grow, releasing the**  
30     **sequestered proteins for functional resumption, but remain unaltered in cells**  
31     **that have not yet started their re-growth. 3. Both the formation and dissolution**  
32     **of quiescent bodies occur in a highly heterogeneous manner among individual**  
33     **cells, and that the degree of their formation is highly correlated with the**  
34     **duration of the lag time taken for bacterial cells to recover. These findings**  
35     **strongly implicate that the quiescent bodies function as a biological timer for**  
36     **growth resumption of the non-growing cells. The maintenance of quiescent body**  
37     **possibly represents a distinguishing feature and is thus helpful for an**  
38     **unequivocal identification of such hitherto elusive dormant (persister) bacterial**  
39     **cells. Our findings shed light not only on how and why a lag time is taken, but**  
40     **also on inventing new ways to eradicate the multidrug-tolerant pathogens, for**

41 **example, by blocking the formation or promoting the dissolution of quiescent**  
42 **bodies in them.**

43

## 44 **Introduction**

45

46 Bacterial cells in the natural environment are considered to mainly exist in a  
47 non-growing/non-dividing dormant state. One remarkable feature of such inert cells is  
48 their capacity to survive under adverse conditions, such as the high temperature (i.e.,  
49 boiling) or the presence of any antibiotic<sup>1-3</sup>. Meanwhile, it has long been recognized  
50 that the non-growing/non-dividing bacterial cells commonly take a lag time,  
51 heterogeneous among the individual cells, before resuming growth when encounter a  
52 growth-supportive condition<sup>4-6</sup>. The lag time is associated with the invasiveness of  
53 pathogens and antibiotic tolerance<sup>7-10</sup>. Recently, it has been suggested that an  
54 extended lag time correlated to an increased tolerance towards antibiotics and this  
55 ‘tolerance by lag’ may further facilitate the subsequent evolution of antibiotic  
56 resistance<sup>11,12</sup>. Nevertheless, it remains poorly understood on how and why a  
57 heterogeneous lag time exists before they recover, mainly due to the low density or  
58 inert metabolic activities for these cells.

59 Here, we discovered a reversible subcellular structure and termed it as the  
60 quiescent body, which sequesters selected essential proteins and is formed in the  
61 non-growing/non-dividing late stationary-phase *E. coli* cells but is dissolved when the  
62 cells resume growth in fresh medium. We further demonstrated that the degree of  
63 quiescent body formation is strongly correlated with the duration of lag time for  
64 bacterial cells to recover, and it apparently functions as a biological timer for the  
65 growth resumption of such non-growing bacterial cells.

66 The finding of quiescent body was made accidentally by us while performing the  
67 unnatural amino acid-mediated protein photo-crosslinking analysis to decipher the  
68 assembling pattern of the cell division protein FtsZ, a homolog of the eukaryotic  
69 tubulin protein<sup>13,14</sup> and whose monomers are known to self-associate into fibrous  
70 protofilaments by using two longitudinal interfaces under *in vitro* conditions<sup>15,16</sup>, in  
71 living *E. coli* cells. Such protofilaments are believed to further assemble, via an  
72 undefined manner, into the Z-ring structure in the middle of each cell before  
73 generating constriction during cytokinesis<sup>17,18</sup>. While commonly performed our *in*  
74 *vivo* protein photo-crosslinking analysis on FtsZ in the actively dividing log-phase  
75 cells, we once did a similar analysis on the non-dividing late stationary-phase cells,  
76 assuming that the FtsZ protein would exist as monomers in them. We found,  
77 strikingly, that a large portion of the FtsZ monomers in the late stationary-phase cells,  
78 though indeed no longer self-assemble into protofilaments, exist in the insoluble  
79 pellet fraction of the cell lysates. We subsequently demonstrated by live-cell imaging  
80 analysis that the FtsZ proteins in late stationary-phase cells largely exist in a type of  
81 cell-pole granules which also contain many other functionally important proteins. We  
82 then revealed that when such non-dividing cells were inoculated in fresh culture

83 medium, the cell-pole granules, which we termed as quiescent bodies, were  
84 effectively dissolved in the re-growing cells, with the sequestered FtsZ protein being  
85 relocated into the Z-ring structure. By contrast, those cells that maintained their  
86 quiescent bodies intact did not initiate their re-growth, thus displaying a significantly  
87 longer lag time. Notably, we found that both the formation (upon entering the  
88 stationary phase) and dissolution (during the recovery) occur in a highly  
89 heterogeneous manner among the individual cells.

90 The quiescent body that we unveiled here apparently acts as a biomarker for an  
91 efficient and unequivocal identification of the hitherto elusive dormant or persister  
92 bacterial cells. More importantly, they conceivably function as a biological timer that  
93 defines the duration of lag time for the non-growing bacterial cells to resume growth.

94

## 95 **Results**

96

### 97 **The FtsZ protein interacts with multiple other proteins and exists in the** 98 **insoluble pellet fraction of non-dividing late stationary-phase *E. coli* cells.**

99 The determined crystal structure of the FtsZ protofilaments reveals a head-to-tail  
100 longitudinal assembling pattern of the FtsZ monomers<sup>19,20</sup>. In light of this structural  
101 information, we initially tried to confirm whether or not such observed assembling  
102 pattern indeed exists in living *E. coli* cells, and meanwhile to identify other interaction  
103 surfaces that would allow such protofilaments to further assemble into the  
104 higher-order Z-ring. To this end, we performed a systematic *in vivo* protein  
105 photo-crosslinking analysis on FtsZ, as mediated by the genetically incorporated  
106 unnatural amino acid p-benzoyl-L-phenylalanine (pBpa)<sup>21,22</sup>, which has been  
107 routinely and effectively used in our laboratory<sup>23-25</sup>. Among the pBpa variants we  
108 prepared, FtsZ-K140pBpa was one in which the residue K140, that is reported to  
109 locate at the longitudinal interface<sup>19,26</sup>, was replaced by pBpa. We first confirmed that  
110 FtsZ-K140pBpa is able to substitute the wild-type FtsZ protein in supporting cell  
111 division (**Fig. S1A**), ruling out any occurrence of major structural disruptions.

112 To unequivocally demonstrate whether or not the residue K140 indeed resides in  
113 the longitudinal assembling surface of FtsZ in living cells, besides heterologously  
114 expressing FtsZ-K140pBpa, we also modified the genomic *ftsZ* gene to produce an  
115 Avi-tagged FtsZ form, designated as FtsZ-Avi, which can thus be detected by using  
116 the streptavidin-alkaline phosphatase conjugate (abbreviated as streptavidin-AP  
117 conjugate) that specifically probes the Avi tag. As shown by the blotting results  
118 displayed in **Fig. 1A**, such FtsZ dimers were clearly detected in the actively dividing  
119 log-phase cells, either as one band probed with streptavidin-AP conjugate (lane 2, red  
120 arrow; formed between FtsZ-K140pBpa and FtsZ-Avi), or as a doublet band probed  
121 with anti-FtsZ antibodies (lane 6, red and black arrows; the bottom band formed  
122 between two FtsZ-K140pBpa monomers). These results confirm that the residue  
123 K140 indeed locates at the self-assembling interface of FtsZ to form protofilaments in  
124 living cells.

125 Out of curiosity, we also performed the above photo-crosslinking experiments  
126 with the non-dividing/non-growing late stationary-phase cells, assuming that the  
127 head-to-tail protofilaments would no longer exist. The results, also displayed in **Fig.**  
128 **1A**, clearly show that the photo-crosslinked dimer between FtsZ-K140pBpa and  
129 FtsZ-Avi became no longer detectable when probed with the streptavidin-AP  
130 conjugate (lane 4), indicating that the FtsZ protofilaments are indeed no longer  
131 maintained in such cells. However, when probed with antibodies against FtsZ,  
132 multiple photo-crosslinked non-dimer products of FtsZ-K140pBpa were detected (**Fig.**  
133 **1A**, lane 8). This indicates that the FtsZ monomer, although no longer self-associates,  
134 now interacts with multiple other proteins via the original longitudinal interface.  
135 Apparently, these interactions may prevent the FtsZ monomers to self-associate into  
136 the protofilaments in the non-dividing cells.

137 We next tried to identify the proteins that interact with FtsZ in the late  
138 stationary-phase cells. For this purpose, we initially attempted to purify the  
139 photo-crosslinked products of FtsZ-K140pBpa (e.g., through immunoprecipitation)  
140 before subjecting them to mass spectrometry analysis. During the purification,  
141 however, we strikingly found that not only almost all the photo-crosslinked products  
142 of FtsZ-K140pBpa but also a large portion of the two types of free FtsZ monomers  
143 were detected in insoluble pellet fraction of the cell lysates (**Fig. 1B**, lane 8), while  
144 the photo-crosslinked FtsZ dimers and the free FtsZ monomers were both detected in  
145 the soluble supernatant (**Fig. 1B**, lane 3), hardly any in the insoluble pellet (**Fig. 1B**,  
146 lane 4) fraction of the log-phase cells.

147 To rule out the possibility that the detection of FtsZ monomers in the pellet  
148 fraction was an artifact due to the introduction of the pBpa residue or the Avi tag in  
149 the FtsZ protein and/or the UV irradiation, we then analyzed the distribution of the  
150 endogenous FtsZ protein in the supernatant and pellet fractions of the late  
151 stationary-phase wild-type *E. coli* cells. Our immunoblotting results, displayed in **Fig.**  
152 **1C**, clearly demonstrate that the endogenous FtsZ protein is similarly detected largely  
153 in the pellet fraction (top panel, lane 6) of late stationary-phase cells, with little in the  
154 pellet fraction (lane 3) of the log-phase cells. For comparison, we found that EF-Tu  
155 (as one of the most abundant proteins) and GroEL (as a molecular chaperone protein  
156 that usually interacts with unfolded client proteins) were both detected largely in the  
157 supernatant (lane 5), hardly in the pellet (lane 6) of late stationary-phase cells (**Fig.**  
158 **1C**, middle and bottom panels, respectively). Taken together, these results strongly  
159 suggest that the FtsZ proteins apparently exist as insoluble forms in late  
160 stationary-phase *E. coli* cells.



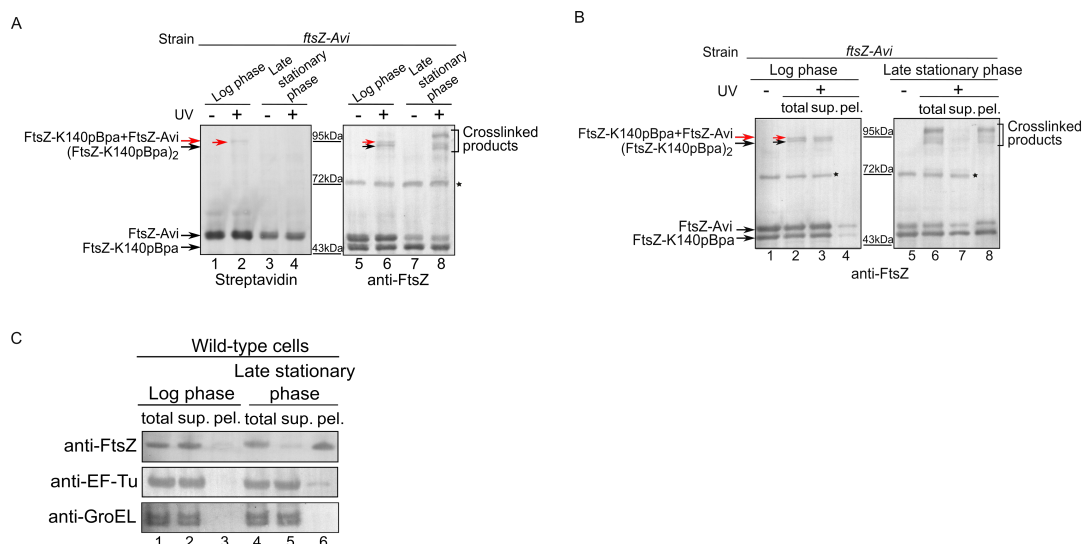

**Figure 1. The FtsZ protein is detected in the insoluble pellet fraction of non-dividing late stationary-phase *E. coli* cells.**

(A) Blotting results for detecting photo-crosslinked products of the FtsZ-K140pBpa variant in log-phase and late stationary-phase cells of the *ftsZ-Avi* strain, probed with the streptavidin-AP conjugate (Streptavidin) or antibodies against FtsZ protein (Anti-FtsZ). Indicated on the left are positions of the two indicated monomers and the two photo-crosslinked dimers, indicated in the middle are positions of the molecular weight markers, indicated on the right are positions of photo-crosslinked products formed between FtsZ-140pBpa and other non-FtsZ proteins. The asterisk indicates a non-specific protein band generated when probed with the anti-FtsZ antibodies.

(B) Immunoblotting results for detecting the photo-crosslinked products and free monomers in the supernatant (sup.) and pellet (pel.) fractions of the log-phase or late stationary-phase *ftsZ-Avi* cells expressing the FtsZ-K140pBpa variant, probed with antibodies against FtsZ. The asterisk indicates the same non-specific protein band as described in (A). Positions of the bands are similarly indicated as in (A).

(C) Immunoblotting results for detecting the endogenous FtsZ, EF-Tu or GroEL in the total cell lysate (total), the supernatant (sup.) and the pellet (pel.) fractions of log-phase or late stationary-phase wild-type *E. coli* cells, probed with the indicated antibodies.

It should be pointed out that in late stationary-phase cells a significant amount of the monomers for either FtsZ-K140pBpa or FtsZ-Avi were detected in the supernatant fraction of the transformed *E. coli* cells (panel B, lane 7), while the endogenous FtsZ in the wild-type cells are largely detected in the pellet fraction (panel C, lane 5). This is most likely due to the fact that the total amount of the FtsZ proteins, as represented by both FtsZ-K140pBpa and FtsZ-Avi, in the transformed cells is significantly higher than that of the endogenous FtsZ in the wild-type cells.

### The FtsZ protein exists in cell-pole granules in the late stationary-phase *E. coli* cell.

We next attempted to gain further insight into the status of FtsZ protein in late stationary-phase *E. coli* cells by performing live-cell fluorescence microscopic imaging analysis. For this purpose, we labeled the FtsZ protein with the green fluorescent protein mNeonGreen by generating the FtsZ-mNeonGreen fusion protein and heterologously expressed it in wild-type *E. coli* cells, similar to what was reported before by others<sup>27</sup>. We confirmed, as shown in Fig. 2A (top part) that this FtsZ-mNeonGreen fusion protein is effectively incorporated into and thus labels the Z-ring structure in the middle of actively dividing log-phase cells.

198 We then subjected the late stationary-phase cells to similar live-cell imaging  
199 analysis, and revealed, of great interest, that the FtsZ-mNeonGreen proteins were  
200 largely detected in two granules that locate at the two cell poles (**Fig. 2A**, bottom part).  
201 For comparison, the similarly expressed unfused mNeonGreen protein was found to  
202 be evenly distributed in the cytoplasm of either log-phase (top panel) or late  
203 stationary-phase (bottom panel) cells (**Fig. S1C**). Subsequent three-dimensional  
204 fluorescence imaging analysis (as displayed in **Movie S1**) showed that such cell-pole  
205 granules take a shape of ellipsoid (**Fig. 2A**, bottom row, enlarged images) whose  
206 ellipticity was calculated to be  $0.35 \pm 0.065$  ( $n > 200$ ). It is pertinent to note that such  
207 an ellipsoid shape is dramatically different from the spherical or rod shape as  
208 commonly taken by inclusion bodies, being a structure commonly formed by a  
209 particular protein that is over-expressed in bacterial cells<sup>28</sup>. Consistent with what we  
210 observed above (**Figs. 1B** and **1C**), a majority of either the endogenous FtsZ or the  
211 heterologously expressed FtsZ-mNeonGreen was detected in the pellet fraction of the  
212 late stationary-phase cells (**Fig. 2B**, lane 6), but in the supernatant fraction of the  
213 log-phase cells (**Fig. 2B**, lane 2). Collectively, these results demonstrate that the FtsZ  
214 protein in non-dividing late stationary-phase cells no longer exists as the Z-ring  
215 structure but as a form of cell-pole granules.

216 We then tried to further clarify the subcellular localization of such cell-pole  
217 granules. For this purposes, we first constructed an *E. coli* strain whose *rhaBAD* gene  
218 in the rhamnose operon was replaced by a gene encoding the FtsZ-mNeonGreen  
219 protein, such that the expression of the latter is directed by the rhamnose-inducible  
220 promoter, as illustrated in **Fig. S1D** (top panel). We verified that the  
221 FtsZ-mNeonGreen protein is produced only in the presence of rhamnose (**Fig. S1D**,  
222 bottom left panel) and the production of FtsZ-mNeonGreen hardly affected the  
223 normal growth of the cells (**Fig. S1D**, bottom right panel). Similarly, the Z-ring in  
224 log-phase cells and the cell-pole granules in late stationary-phase cells were observed  
225 for the *ftsZ-mNeonGreen* strain when cultured in the presence of rhamnose (**Fig.**  
226 **S1E**).

227 We then separately labeled the outer membrane with OmpA (an outer membrane  
228 protein)-fused red fluorescent protein mCherry<sup>29</sup> (**Fig. 2C**, top panel), the inner  
229 membrane with the inner membrane anchoring peptide (derived from the nlpA  
230 protein)-fused mCherry<sup>30</sup> (**Fig. 2C**, middle panel) and the cytosol with the unfused  
231 mCherry (**Fig. 2C**, bottom panel) in the *ftsZ-mNeonGreen* strain. The live-cell  
232 imaging data displayed in **Fig. 2C** clearly show that the cell-pole granules occupy a  
233 cytosolic location which is hardly accessible to the cytosolic mCherry proteins  
234 (bottom panel), suggesting that the structure of the granules are rather compact.  
235 Collectively, these imaging data unequivocally demonstrate that, in late  
236 stationary-phase cells, the FtsZ protein largely exists in the compact cell-pole  
237 granules with a shape significantly different from that of inclusion bodies.

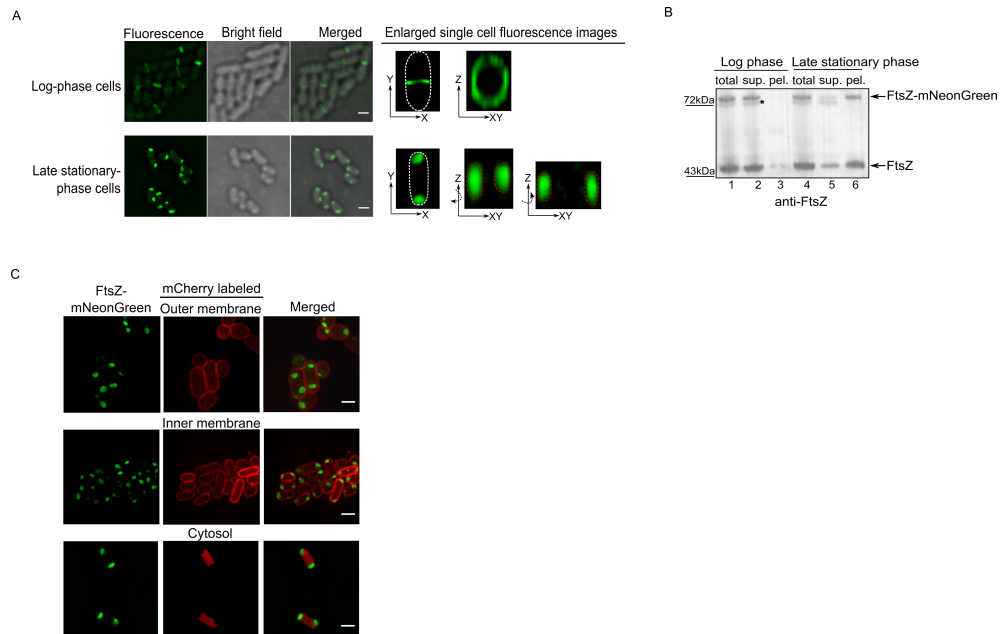

238

239

240

**Figure 2. The heterologously expressed FtsZ-mNeonGreen protein exists in a form of cell-pole granules in late stationary-phase *E. coli* cells.**

241

**(A)** Fluorescence and bright field microscopic images of the log-phase (cultured to 6 h; top panel) and late stationary-phase (cultured to 24 h; bottom panel) *E. coli* cells in which the FtsZ-mNeonGreen protein, besides the endogenous FtsZ protein, was heterologously expressed from a plasmid. Enlarged single cell fluorescent images are also displayed for a better view of the Z-ring structure (in the log-phase cells) and the cell-pole granules (in late stationary-phase cells). Scale bars, 1  $\mu$ m.

247

**(B)** Immunoblotting results for detecting both the endogenous FtsZ and the heterologously expressed FtsZ-mNeonGreen in the total cell lysate (total), supernatant (sup.) and pellet (pel.) fractions of log-phase or late stationary-phase cells, probed with antibodies against FtsZ. Positions of FtsZ and FtsZ-mNeonGreen are indicated on the right and of the molecular weight markers on the left. The asterisk indicates the non-specific protein band.

249

**(C)** Fluorescence microscopic images of late stationary-phase *ftsZ-mNeonGreen* cells whose outer membrane (top), inner membrane (middle) or cytosol (bottom) was separately labeled via the fused mCherry (for the two membranes) or unfused mCherry (for the cytosol). Scale bars, 1  $\mu$ m.

252

253

254

255

256

257

**The cell-pole granule or quiescent body selectively sequesters proteins that are vital to cell growth and division.**

260

After searching the literatures, we noticed a report that described the isolation (via sucrose gradient centrifugation) of a multi-protein aggregates which are only formed in stationary-phase *E. coli* cells<sup>31</sup>. However, without a further analysis on the status of the proteins, the authors assumed that such aggregates are made of misfolded proteins and destined for degradation. As a matter of fact, it remains a great challenge to directly demonstrate whether a protein in such insoluble structures is folded or not even under *in vitro* conditions, let alone in living cells. Despite of this, we made an effort to find out whether the FtsZ proteins residing in the cell-pole granules are folded, noting that the FtsZ protein was reported not to form inclusion bodies when over-expressed in bacterial cells<sup>32</sup>.

269

270 To this end, we again exploited the *in vivo* protein photo-crosslinking analysis  
271 mediated by the unnatural amino acid pBpa, assuming that the pBpa variants of FtsZ  
272 protein would form photo-crosslinked products with other proteins in a  
273 surface-specific manner if it is folded<sup>33</sup>. Specifically, we performed the *in vivo* protein  
274 photo-crosslinking in late stationary-phase cells for a number of pBpa variants of FtsZ,  
275 which were isolated from a random library that we constructed (details to be  
276 described elsewhere).

277 When probed with streptavidin-AP conjugate (against the Avi tag), the blotting  
278 results show that, similar to FtsZ-K140pBpa (**Fig. 1A**, lane 4), none of these pBpa  
279 variants formed photo-crosslinked FtsZ dimers (results for 11 of them are displayed in  
280 **Fig. S2A**) in late stationary phase cells. When the same samples were probed with  
281 antibodies against FtsZ, as shown in **Fig. 3A**, we found that the pBpa variants of the  
282 FtsZ protein interact with other particular proteins apparently in a surface specific  
283 fashion. Specifically, for example, when pBpa was placed at residue position 151, 166  
284 or 174 (**Fig. 3A**, lanes 2, 4 and 6), all of which occupy a spatial position adjacent to  
285 K140 according to the determined crystal structure of FtsZ monomer<sup>34</sup>, a pattern of  
286 photo-crosslinked products largely comparable to that of FtsZ-K140pBpa was  
287 revealed (**Fig. 1A**, lane 8). Similarly, the four variants with pBpa introduced at  
288 position 31, 47, 51 or 54, all of which are adjacent to each other but distant from  
289 K140, also generated a pattern of photo-crosslinked products similar to each other but  
290 different from that of FtsZ-K140pBpa (**Fig. 3A**, lanes 8, 10, 12 and 14). In contrast,  
291 the variants with pBpa at the rest positions (**Fig. 3A**, lanes 16, 18, 20, 22, 24, 26 and  
292 28), each occupying a non-adjacent spatial position, generated no or individually  
293 unique patterns of crosslinked products. Collectively, these observations indicate that  
294 the FtsZ proteins in the cell-pole granules of late stationary-phase cells are apparently  
295 folded.

296 We next attempted to find out whether or not such cell-pole granules could  
297 maintain their structure and thus be isolated as intact entities after the cells are lysed.  
298 The imaging results shown in **Fig. 3B** clearly demonstrate that such granules could  
299 still be clearly detected in the cell lysates. We subsequently collected the granules as  
300 the centrifugation pellet of the lysed wild-type *E. coli* cells and then re-suspended it in  
301 8 M urea to effectively dissolve the protein components within them, before the large  
302 membrane fragments to be removed as the new pellet through another round of  
303 centrifugation. Afterwards, the new supernatant was concentrated by about 10-fold  
304 before the sample was resolved by SDS-PAGE. The Coomassie blue staining results,  
305 displayed in **Fig. 3C**, revealed many protein bands (lane 10), with a pattern apparently  
306 different from that of the total cell lysates (lane 5), suggesting that the protein  
307 components present in the cell-pole granules are selected. This meanwhile  
308 demonstrate that the protein composition of the cell-pole granules is clearly  
309 distinguishable from that of the inclusion body, which is commonly composed of  
310 several dominant proteins that are heterologously over-expressed<sup>28</sup>.

311 We subsequently excised the protein bands that could be clearly visualized on the  
312 gel for mass spectrometry analysis. As listed in **Fig. 3D**, besides FtsZ, numerous key  
313 proteins that are known to function in such fundamental biological processes as  
314 transcription, translation, metabolism and cell division were identified. We verified  
315 the presence of five of these identified proteins, by separately expressing each as an  
316 Avi-tagged form from a plasmid construct, in the pellet fraction of late  
317 stationary-phase and in the supernatant fraction of log-phase cells, as shown in **Fig.**  
318 **3E** (lanes 6 vs 3).

319 Our live-cell imaging analysis, performed by fusing the target protein with  
320 mNeonGreen, also verified the presence of FtsA and ZapC, two proteins that we  
321 identified in the cell-pole granules and are known to function in cell division<sup>27,35</sup>, in  
322 Z-ring structure of log-phase cells but in cell-pole granules of late stationary-phase  
323 cells (**Fig. S2B**). By contrast, FtsL and ZapA, two proteins that we did not identify in  
324 the cell-pole granules but are also known<sup>36</sup> and confirmed by us to be present in the  
325 Z-ring structure of log-phase cells, were found to be evenly distributed in the  
326 cytoplasm, rather than in the cell-pole granules, in late-stationary phase cells (**Fig.**  
327 **S2B**). In addition, we demonstrated that FtsA (fused with the red fluorescent protein  
328 mCherry) co-localizes with FtsZ (fused with mNeonGreen), not only in the Z-ring  
329 structure of log-phase cells but also in the cell-pole granules either in late  
330 stationary-phase cells or in their lysates, as shown in **Fig. S2C**. Taken together, these  
331 observations suggest that the cell-pole granules apparently sequester selected proteins  
332 which are important for cell growth and division. In view that the cell-pole granules  
333 are only formed in the non-growing/non-dividing late-stationary phase bacterial cells,  
334 we hereafter designate them as “quiescent bodies” and continue to explore their  
335 biological significance by utilizing FtsZ-mNeonGreen as the biomarker.



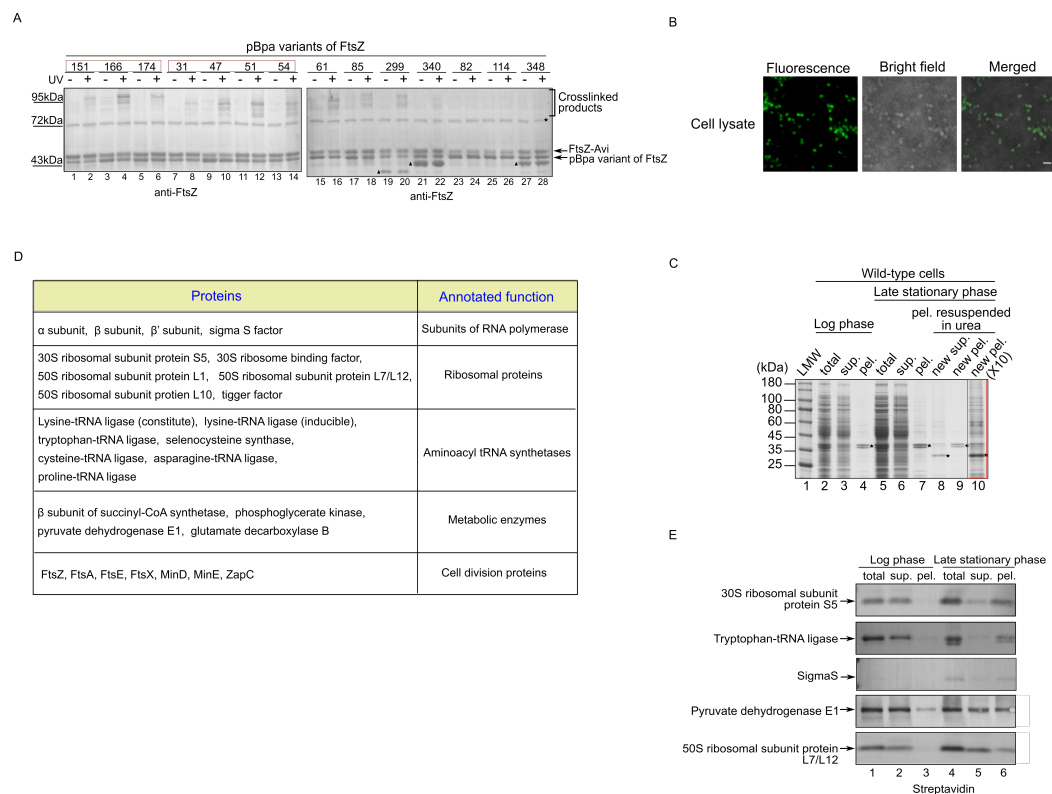

336  
337  
338  
339  
340  
341  
342  
343  
344  
345  
346  
347  
348  
349  
350  
351  
352  
353  
354  
355  
356  
357  
358  
359  
360  
361  
362  
363

### Figure 3. The cell-pole granules (quiescent bodies) selectively sequester proteins essential for cell growth and division.

(A) Immunoblotting results for detecting the photo-crosslinked products of the indicated pBpa variants of FtsZ in late stationary-phase *ftsZ-Avi* cells, as probed with antibodies against FtsZ. The asterisk indicates a non-specific protein band, and the triangles indicate the truncated forms of FtsZ produced due to the failure of pBpa incorporation at the replaced TAG stop codon.

(B) Fluorescence and bright field microscopic images of the cell-pole granules as detected in lysates of late stationary-phase (cultured to 24 h) cells in which the FtsZ-mNeonGreen protein was heterologously expressed in addition to the endogenous FtsZ.

(C) Coomassie blue-stained SDS-PAGE results for detecting the proteins present in the total lysate (lanes 2 and 5), supernatant (lanes 3 and 6) and pellet fractions (lanes 4 and 7) of log-phase or late stationary-phase wild-type *E. coli* cells. The pellet of the lysate (as analyzed in lane 7) of late stationary-phase cells was dissolved in 8 M urea and re-centrifuged, with the new supernatant (new sup.; lane 8) being concentrated by approximately 10-fold before loaded for the gel electrophoresis (lane 10). Asterisks (in lanes 4 and 7-10) indicate the protein bands that were identified by mass spectrometry analysis as outer membrane proteins OmpA, OmpF and OmpC, which apparently ended in the pellet fraction as large outer membrane fragments that were generated during cell lysis by French Press.

(D) List of major proteins that were identified in the quiescent body-containing insoluble pellet by mass spectrometry analysis.

(E) Blotting results for analyzing the distribution of the indicated proteins, that were identified in the quiescent bodies and linked with an Avi tag, in the indicated fractions of log-phase or late stationary-phase wild-type *E. coli* cells, probed with streptavidin-AP conjugate against the Avi tag. Of note, the sigma S factor was previously reported only to be accumulated in late stationary-phase but not in log-phase bacterial cells<sup>37</sup>.

### Quiescent bodies are formed in a heterogeneous manner among individual cells.

Before our effort to identify the factors that trigger the formation of quiescent bodies, we first examined the time course of quiescent body formation during cell culturing. For this purpose, we monitored the status of the FtsZ protein by performing live-cell imaging analysis with the *ftsZ-mNeonGreen* cells cultured to particular time

364  
365  
366  
367  
368



369 points from 6 h (log-phase) to 24 h (late-stationary phase) and in the presence of  
370 rhamnose (to induce the production of the FtsZ-mNeonGreen protein).

371 The data displayed in Fig. 4 reveal, remarkably, that the formation of quiescent  
372 bodies appears to be highly heterogeneous among individual cells. Specifically, at the  
373 12 h culturing point, although the Z-ring structure became no longer visible in many  
374 cells, quiescent bodies are not yet visible in them. At the 15 h culturing point,  
375 although the Z-ring structure remained visible in some of the cells, quiescent bodies  
376 started appearing in many of the rest. At the 18 h culturing point, the Z-ring structure  
377 became no longer visible and the quiescent bodies appeared almost in all the cells. At  
378 the 21 h culturing point, quiescent bodies appear to be fully formed in all the cells.  
379 The heterogeneity of quiescent body formation is most clearly indicated by the  
380 imaging data recorded at the 15 h point, when the Z-ring structures remain visible in  
381 some of the cells while quiescent bodies are well formed in some others. Additionally,  
382 quiescent body formation seems to first start at one cell pole rather than start  
383 simultaneously at both poles in each individual cell and that each quiescent body  
384 appears to be formed in a multi-stage and progressive manner.

385

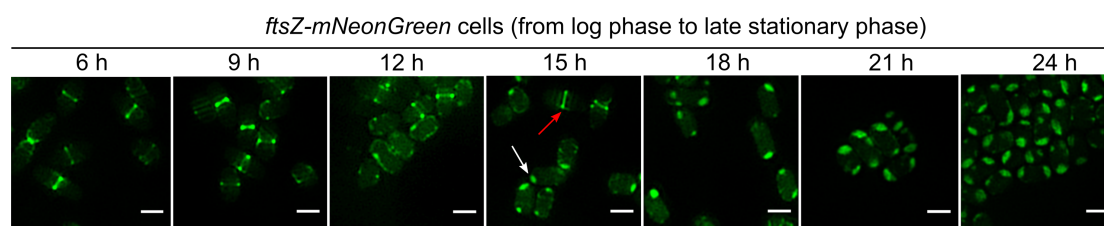

386

387

388 **Figure 4. The formation of quiescent bodies appears to be highly heterogeneous among**  
389 **individual *E. coli* cells.**

390 Fluorescence microscopic images of the *ftsZ-mNeonGreen* cells recorded at the indicated time  
391 points of culturing. Cells were grown in Luria-Bertani (LB) medium containing 0.02% rhamnose.  
392 Scale bars, 1  $\mu$ m.

393

394

395 **Formation of quiescent bodies could be effectively induced in log-phase cells that**  
396 **are placed in the late stationary-phase culture medium or induced by indole.**

397 The fact that quiescent bodies start to be formed in the cells only until certain  
398 culturing points strongly suggests that their formation is triggered due to the  
399 accumulation of certain signaling molecules produced by the cells themselves during  
400 their culturing in the Luria-Bertani medium. This is somehow analogous to the effect  
401 of the quorum sensing signaling molecules that are accumulated in the culture  
402 medium when the cell density reaches a certain level<sup>38</sup>. We then assessed whether or  
403 not the culture medium derived from late stationary phase (of 24 h culturing) is able  
404 to induce the formation of quiescent bodies in the actively dividing log-phase cells (of  
405 6 h culturing). Data presented in Fig. 5A (top panel) reveal that the Z-ring structure  
406 started to disappear after the log-phase cells were placed in the late-stationary phase  
407 culture medium for as short as 1 hour, with quiescent bodies to be fully formed almost  
408 in all the cells after approximately 4 hours. As a control, the Z-ring structure was

409 clearly visible in all the untreated cells after a parallel culturing for the same duration  
 410 (Fig. 5A, bottom panel). These results indicate that certain factor, likely produced by  
 411 the normal metabolic activities of the cells, was accumulated and induced the  
 412 formation of quiescent bodies.

413 It has been documented that the catabolism of amino acids will proceed after the  
 414 sugars are exhausted for bacterial cells cultured in LB medium<sup>39</sup>. This leads to  
 415 accumulation of certain metabolic products such as ammonia and indole in the culture  
 416 medium<sup>39-41</sup>. In light of this, we then examined whether ammonia or indole is able to  
 417 substitute the late stationary-phase culture medium in inducing the formation of  
 418 quiescent bodies in log-phase cells. We demonstrated that ammonia appears to be  
 419 ineffective in inducing the formation of quiescent bodies in log-phase cells. By  
 420 contrast, quiescent bodies became clearly visible in log-phase cells that were treated,  
 421 for example, with 5 mM indole for as short as 1 hour, or 2.5 mM indole for 2 hours  
 422 (Fig. 5B). In line with this, the FtsZ protein was significantly detected in the pellet  
 423 fraction of such indole-treated log-phase cells (Fig. 5C, lane 6). Nevertheless, we  
 424 found that quiescent bodies could still be effectively formed in late stationary-phase  
 425 cells lacking the *tnaA* gene, which encodes the tryptophanase enzyme that is believed  
 426 to be responsible for producing indole from L-tryptophan in bacterial cells<sup>40,42</sup> (Fig.  
 427 S3). These results indicate that indole, though effective in inducing the formation of  
 428 quiescent bodies in log phase cells, is still apparently not the essential factor for the  
 429 formation of quiescent bodies in stationary-phase cells.

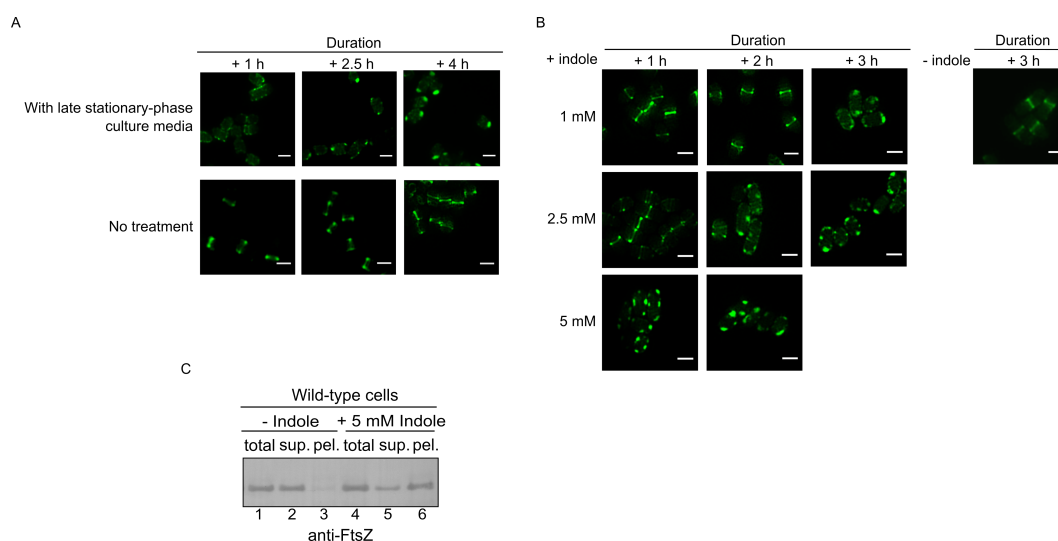

430

431 **Figure 5. Late stationary-phase LB culture medium or indole is able to effectively induce the**  
 432 **formation of quiescent bodies in log-phase *E. coli* cells.**

433 (A) Fluorescence microscopic images of log-phase *ftsZ-mNeonGreen* cells that were placed in late  
 434 stationary-phase LB culture medium for the indicated duration (top panel). The untreated  
 435 log-phase cells that were further cultured were analyzed here as the negative control (bottom  
 436 panel). Scale bars, 1  $\mu$ m.

437 (B) Fluorescence microscopic images of log-phase *ftsZ-mNeonGreen* cells that were treated with  
 438 indole (+ indole) of the indicated concentrations and durations. As the negative control (- indole),  
 439 the cells were treated with DMSO (the solvent used for dissolving indole). Scale bars, 1  $\mu$ m.

440 (C) Immunoblotting results for detecting the presence of FtsZ in the total cell lysate (total, lane 4),  
 441 supernatant (sup., lane 5) or pellet (pel., lane 6) fraction of the log-phase wild-type cells that were

442 treated with indole (5 mM) for 1 h, as probed with antibodies against FtsZ. Untreated cells (-  
443 indole) were analyzed here as the negative control (lanes 1-3).

444

445

#### 446 **Formation of quiescent bodies relies on the operation of cellular respiration.**

447 During the experiments described above (**Fig. 5B**), we accidentally noticed that a  
448 sufficient supply of oxygen is critical for indole to exhibit its inducing effect.  
449 Specifically, quiescent bodies would not be formed in the log-phase cells if the  
450 induction was performed in airtight tubes and without shaking, as shown in **Fig. 6A**  
451 (the - O<sub>2</sub> image). Given that indole was reported to be able to dissipate the proton  
452 gradient across the inner membrane in *E. coli* cells<sup>43</sup>, such an inducing effect of  
453 indole might be due to its acceleration of the electron transferring process, which  
454 would rely on an adequate supply of oxygen. This speculation is partly supported by  
455 our observation that the inducing effect of indole on quiescent body formation would  
456 be eliminated in the presence of glucose, whose metabolism was known to inhibit  
457 cellular respiration<sup>41,44</sup>, in the culture medium before the log-phase cells were treated  
458 with indole even in a sufficient supply of oxygen (**Fig. 6A**; the + O<sub>2</sub>, + Glc image).

459 We then assessed whether the occurrence of cellular respiration is essential for  
460 quiescent body formation in bacterial cells. For this purpose, we examined whether or  
461 not quiescent body formation will be affected either in the *ftsZ-mNeonGreen* (for the  
462 imaging analysis shown in **Fig. 6B**) or in wild-type (for the immunoblotting analysis  
463 shown in **Fig. 6C**) strain in which either the *nuoA* or *sdhC* gene was knocked down by  
464 using the CRISPRi technology<sup>45</sup>. The results, as shown in **Fig. 6B** (right column  
465 images), revealed that the formation of quiescent body hardly occurs in the *sdhC*  
466 knockdown or rarely in the *nuoA* knockdown late-stationary phase cells. Consistently,  
467 formation of quiescent bodies no longer occurs in the log-phase cells of either the  
468 *sdhC* or *nuoA* knockdown strain that were treated with indole (**Fig. 6B**, middle  
469 column images). In line with this failure of quiescent body formation, the  
470 immunoblotting data, shown in **Fig. 6C**, indicate that little endogenous FtsZ protein  
471 was detected in the pellet fraction (lanes 6 or 9) of the late stationary-phase *nuoA* or  
472 *sdhC* knockdown cells. Taken together, these observations indicate that the normal  
473 operation of cellular respiration is essential for the formation of quiescent bodies in  
474 bacterial cells. It should be pointed out that we achieved similar results with the  
475 *nouAB* or *sdhCDAB* knockout *E. coli* mutant strain.

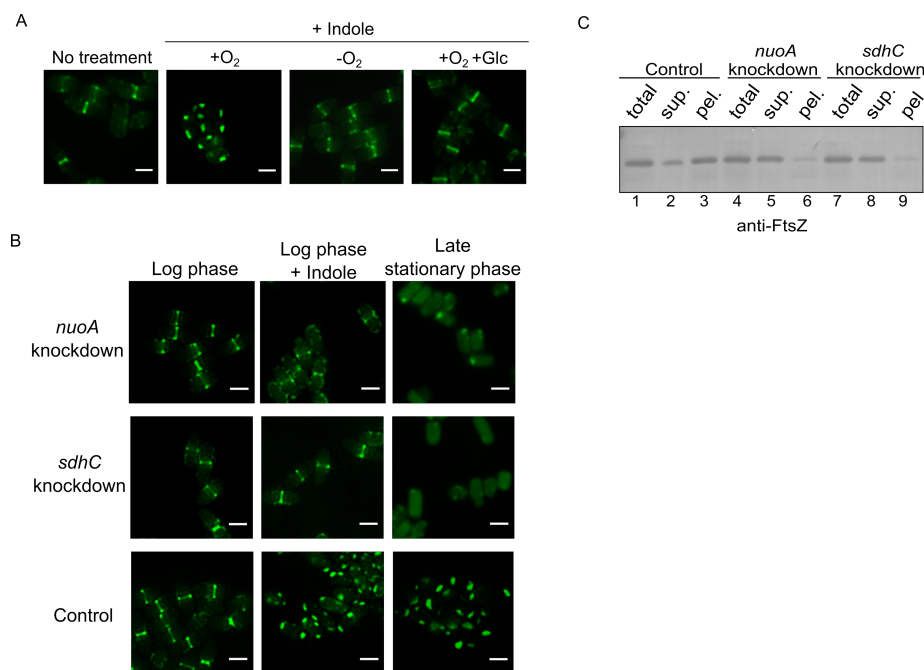

476

477 **Figure 6. Normal operation of cellular respiration is essential for the formation of quiescent**  
 478 **bodies.**

479 (A) Fluorescence microscopic images of log-phase *ftsZ-mNeonGreen* cells that were treated with  
 480 indole (5 mM) for 1 h, under the indicated conditions of oxygen and glucose supplies. Scale bars,  
 481 1  $\mu$ m.

482 (B) Fluorescence microscopic images of log-phase (untreated or treated with indole) or late  
 483 stationary-phase *ftsZ-mNeonGreen* cells possessing a knockdown of the *nuoA* or *sdhC* gene. For  
 484 the control, a non-targeting crRNA (CRISPR RNA) was expressed in the *ftsZ-mNeonGreen* cells.  
 485 Scale bars, 1  $\mu$ m.

486 (C) Immunoblotting results for detecting the distribution of FtsZ in the indicated fractions of late  
 487 stationary-phase *nuoA*- or *sdhC*-knockdown cells, probed with anti-FtsZ antibodies.

488

489

490 **Quiescent bodies are dissolved in a highly heterogeneous manner among**  
 491 **individual cells with the FtsZ protein being re-utilized to form the Z-ring**  
 492 **structure when late stationary-phase cells are re-cultured in fresh medium.**

493 We subsequently tried to gain insight on the biological significance of the  
 494 quiescent body. To this end, we first examined the fate of the quiescent bodies when  
 495 the late stationary-phase *ftsZ-mNeonGreen* cells were placed in fresh culture medium.  
 496 Live-cell imaging data shown in Fig. 7A indicate, intriguingly, that when re-cultured  
 497 in fresh LB medium lacking rhamnose (thus no new FtsZ-mNeonGreen protein would  
 498 be synthesized), a time-dependent relocation of the FtsZ-mNeonGreen protein from  
 499 the quiescent bodies to the Z-ring structure was clearly observed as soon as a cell  
 500 starts to re-grow (marked by an increase in size; as represented by the two cells  
 501 circled with white lines). By contrast, quiescent bodies remained unaltered in cells  
 502 that had not yet started their re-growth (marked by a lack of size increase; as  
 503 represented by the two cells circled with red lines in Fig. 7A).

504 The remarkable reversible nature of the FtsZ proteins sequestered in the quiescent  
 505 bodies was further verified. Specifically, the immunoblotting results, shown in Fig.  
 506 7B, demonstrate that while the FtsZ protein detected in the pellet fraction of wild-type

507 (not the *ftsZ-mNeonGreen*) cells became gradually reduced (lanes 3 to 6 to 9), those  
508 detected in the supernatant fraction became gradually increased (lanes 2 to 5 to 8),  
509 during the re-culturing of the late stationary-phase cells. In line with this, we also  
510 observed a time-dependent increase in the level of photo-crosslinked FtsZ-K140pBpa  
511 homo-dimers, accompanied with a parallel decrease in the level of the  
512 photo-crosslinked products between FtsZ-K140pBpa and other proteins (lanes 2-4,  
513 **Fig. 7C**) in the cells that were re-cultured in fresh LB medium lacking pBpa (thus no  
514 new FtsZ-K140pBpa protein would be synthesized). Taken together, these  
515 observations reveal that the proteins (as represented by FtsZ) sequestered in quiescent  
516 bodies could be released for functional resumption when the late stationary-phase  
517 cells re-grow and re-divide in fresh medium.

518 Interestingly, the live-cell imaging data of the *ftsZ-mNeonGreen* cells, as  
519 displayed in **Fig. 7A**, also clearly demonstrate that the dissolution of quiescent bodies,  
520 analogous to their formation (as shown in **Fig. 4**), also occurs in a highly  
521 heterogeneous manner among individual cells. It is conceivable that such a  
522 heterogeneity in their formation and dissolution are related in a certain way. For  
523 example, the formation of quiescent bodies in each stationary-phase cell apparently  
524 occurs in multiple consecutive stages such that those more mature ones may take  
525 longer time to initiate their dissolution. It follows that the time taken for the quiescent  
526 bodies to initiate their dissolution in each bacterial cell may correspond to the lag time  
527 during cell recovery<sup>6,39,46</sup>.

528 We next examined whether or not the FtsZ proteins in the quiescent bodies could  
529 be released when the synthesis of all proteins is suppressed by the presence of the  
530 antibiotic chloramphenicol<sup>47</sup>. The live-cell imaging data shown in **Fig. 7D** reveal a  
531 similar time-dependent disappearance of the FtsZ-mNeonGreen protein in quiescent  
532 bodies in the cells that initiated their re-growth (e.g., the two white circled cells).  
533 With no exception, the heterogeneity phenomenon of quiescent body dissolution was  
534 once again clearly observed here (one non-growing cell whose quiescent bodies  
535 remain unaltered is indicated by the red circled cell in **Fig. 7D**). Again,  
536 immunoblotting results, displayed in **Fig. 7E**, clearly reveal a similar solubility  
537 change of the FtsZ protein as observed above (**Fig. 7B**) during the re-culturing of the  
538 wild-type (not the *ftsZ-mNeonGreen*) cells. These observations suggest that the  
539 dissolution of quiescent bodies apparently does not rely on new protein synthesis and  
540 thus qualifies as an early event for non-growing bacterial cells to recover.

541 Collectively, the data displayed in **Fig. 7** suggest that the proteins sequestered in  
542 quiescent bodies can be effectively released to resume their functions upon cell  
543 re-growth/re-division, and that the lag time during the recovery of non-growing  
544 bacterial cells apparently reflect the time taken for the quiescent bodies to initiate  
545 their dissolution (as further demonstrated below).



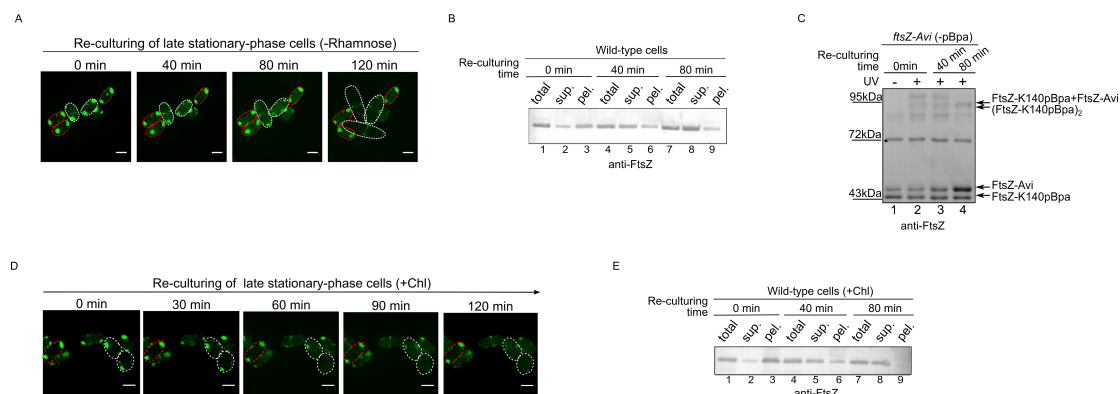

546

547

548 **Figure 7. The quiescent bodies are dissolved in a highly heterogeneous manner among**  
 549 **individual cells upon their re-growth/re-division releasing the sequestered FtsZ proteins that**  
 550 **are re-utilized in forming the Z-ring structure.**

551 (A) Live-cell fluorescence microscopic images of late stationary-phase *ftsZ-mNeonGreen* cells  
 552 that were re-cultured to the indicated time points in fresh LB medium lacking rhamnose. The cells  
 553 indicated by red circles did not start their re-growth while those indicated by white circles started  
 554 their re-growth during the 120 min of re-culturing. (Note: one of the re-growing cells divided into  
 555 two daughter cells at the 120 min re-culturing time point). Scale bars, 1  $\mu\text{m}$ .

556 (B) Immunoblotting results for detecting the distributions of FtsZ in the supernatant (sup.) and  
 557 pellet (pel.) fractions of the late stationary-phase wild-type (not the *ftsZ-mNeonGreen*) cells that  
 558 were re-cultured in fresh LB medium to the indicated time points, probed with anti-FtsZ  
 559 antibodies.

560 (C) Immunoblotting results for detecting the photo-crosslinked products of FtsZ-K140pBpa  
 561 expressed in the late stationary-phase *ftsZ-Avi* cells that were re-cultured to the indicated  
 562 time points in fresh LB medium lacking pBpa, probed with antibodies against FtsZ. Indicated on the  
 563 right are positions of the FtsZ monomers, being FtsZ-K140pBpa and FtsZ-Avi, and the  
 564 photo-crosslinked FtsZ dimers, being (FtsZ-K140pBpa)<sub>2</sub> and FtsZ-K140pBpa+FtsZ-Avi.

565 (D) Live-cell fluorescence microscope images (recorded at 37°C) of the late stationary-phase  
 566 *ftsZ-mNeonGreen* cells that were inoculated to the indicated time points in fresh LB medium  
 567 containing the antibiotic chloramphenicol which inhibits the overall protein synthesis in the cells.  
 568 Two cells whose quiescent bodies were dissolving are indicated by the white circles; one cell  
 569 whose quiescent bodies remained unaltered during the 120 min of re-culturing is indicated by the  
 570 red circle. Scale bars, 1  $\mu\text{m}$ .

571 (E) Immunoblotting results for detecting the distributions of the FtsZ protein in the indicated  
 572 fractions when the late stationary-phase wild-type (not the *ftsZ-mNeonGreen*) cells were  
 573 re-cultured to the indicated time points in fresh LB medium containing chloramphenicol, probed  
 574 with anti-FtsZ antibodies.

575

576

577 **The degree of quiescent body formation in the non-growing cells is correlated**  
 578 **with the duration of the lag time for their re-growth.**

579 We next tried to find out whether or not the duration of lag time for the bacterial  
 580 cell recovery can be correlated to the degree of quiescent body formation in the  
 581 non-growing cells. For this purpose, we decided to make use of the multiple types of  
 582 *E. coli* cells that form quiescent bodies to different degrees, as described above (Figs.  
 583 4, 5B and 6B). Additionally, we decided to express their lag time as the average initial  
 584 doubling time upon re-division (abbreviated as re-division  $T_{id}$ ), which was calculated  
 585 on the basis of their re-culturing growth curves (displayed in Fig. S5).

586 The lag time measurement results of the multiple types of cells, described in Figs.  
 8A-8C, reveal a strong correlation between the duration of lag time and the degree of



587 quiescent body formation (as shown in **Figs. 4, 5B** and **6B**) in the recovering bacterial  
588 cells. First, as shown in **Fig. 8A**, the re-division  $T_{id}$  value is increased by about 3 fold  
589 for cells pre-cultured for 24 h (being ~108 min) when compared with cells  
590 pre-cultured for 12 h (being ~34 min). It should be pointed out that the re-division  $T_{id}$   
591 value of the cells pre-cultured for 12 h was largely comparable with that of the  
592 log-phase cells (being ~26 min; equivalent to the “- indole, + O<sub>2</sub>” bar in **Fig. 8B**).  
593 Second, as shown in **Fig. 8B**, the re-division  $T_{id}$  value of the indole-treated log-phase  
594 cells (the “+ indole, + O<sub>2</sub>” bar) was about 2.5 fold (~65 min vs ~26 min) of that of the  
595 non-treated cells (the “- indole, + O<sub>2</sub>” bar). Third, as shown in **Fig. 8C**, the difference  
596 in re-division  $T_{id}$  values between the late stationary phase (24 h culturing) and the  
597 early stationary phase (12 h culturing) cells for either the *nuoA* or *sdhC* knockdown  
598 strain was much less, when compared with that for the wild type control cells (in  
599 which a non-targeting CRISPR RNA was transcribed). Fourth, as also shown in **Fig.**  
600 **8C**, for the *sdhC* knockdown strain (in which quiescent bodies no longer form), the  
601 re-division  $T_{id}$  value of its late stationary-phase cells is not higher but largely  
602 comparable with that of its early stationary-phase cells.

603 Consistently, we also observed a strong correlation between the degree of  
604 quiescent body formation and the level of antibiotic tolerance. For instance, as shown  
605 in **Fig. 8D**, we demonstrated that the survival rate of the indole-treated log-phase *E.*  
606 *coli* cells (the “+ indole, + O<sub>2</sub>” bars), in which quiescent bodies were effectively  
607 formed, was approximately 10-fold higher than that of the untreated cells (the “-  
608 indole, + O<sub>2</sub>” bars) when inoculated in fresh medium containing either ofloxacin or  
609 ampicillin. Similarly, as shown in **Fig. 8E**, the survival rate of the quiescent  
610 body-lacking stationary-phase *sdhC*-knockdown cells was approximately 50-fold  
611 lower than that of the stationary-phase wild-type cells in which a non-targeting  
612 crRNA was expressed (the “control” bars). Likewise, the survival rate of the  
613 *nuoA*-knockdown cells was approximately 5-fold lower than that of the control cells  
614 (**Fig. 8E**).

615 In line with the observations on lag time and antibiotic tolerance, our live-cell  
616 imaging analysis with the *ftsZ-mNeonGreen* cells, as shown in **Fig. 8F**, revealed that  
617 only cells (e.g., the two circled by white lines) whose quiescent bodies became  
618 dissolved were eventually killed after a swelling (i.e., became invisible at a certain  
619 time point after an increase in their sizes) in the presence of ampicillin during the  
620 re-culturing process. By contrast, the cells (e.g., the one circled by red lines in **Fig. 8F**)  
621 whose quiescent bodies maintained intact remained unaltered (i.e., remained visible in  
622 their original sizes at all the time points) during such re-culturing process. These  
623 results meanwhile suggest that the quiescent body probably can be viewed as a  
624 biomarker to label the unawakened cells during bacterial re-culturing process.

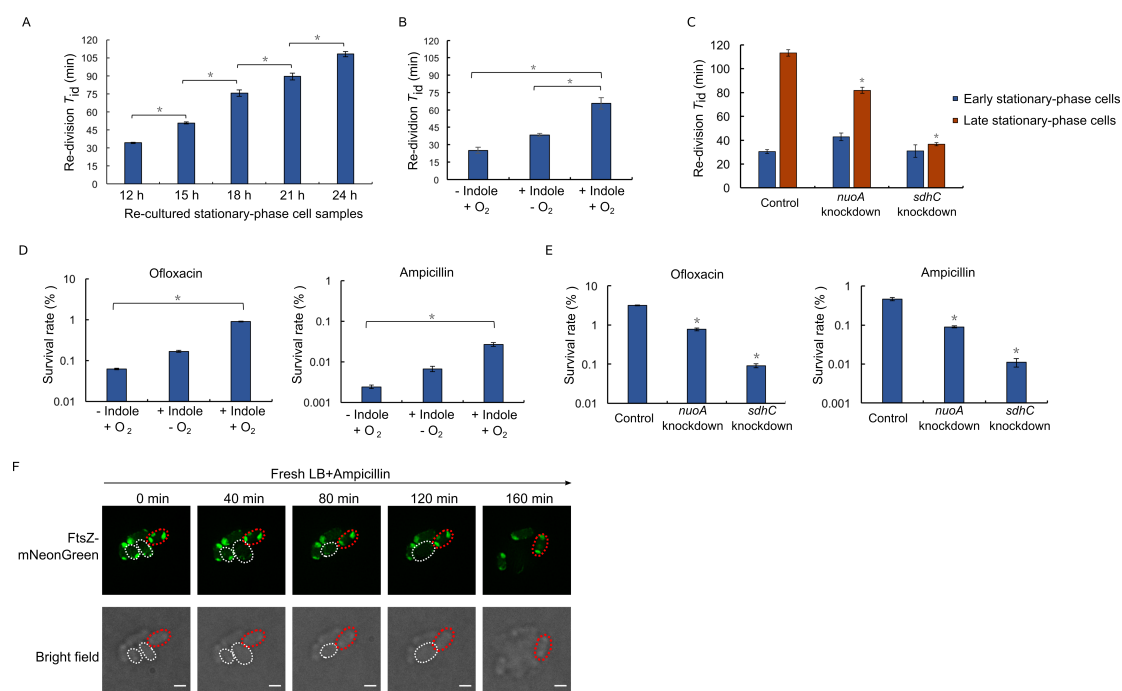

625

626

627

**Figure 8. The degree of quiescent body formation in the non-growing bacterial cells is correlated with the duration of the lag time for their recovery.**

628

(A) The re-division  $T_{id}$  of wild-type stationary-phase cells that were pre-cultured to the indicated time points. The cells were re-cultured (after diluting 40-fold) at 37°C in fresh LB medium. The re-division  $T_{id}$  values were calculated based on the increase in cell number within the first 30 min of the re-culturing cells (for details, see Methods).

629

630

(B) The re-division  $T_{id}$  values of wild-type log-phase cells that were untreated (- indole) or treated (+ indole) with indole (5 mM, 1 h) and having an adequate (+  $O_2$ ) or limited (-  $O_2$ ) oxygen supplies.

631

632

(C) The re-division  $T_{id}$  values of early (blue bars) or late (red bars) stationary-phase wild-type (control; in which a non-targeting crRNA was transcribed from a plasmid) and the *nuoA* or *sdhC* knockdown cells.

633

634

(D) Survival rates of wild-type log-phase cells that were untreated (- indole) or treated (+ indole) with indole, and with the adequate (+  $O_2$ ) or limited (-  $O_2$ ) oxygen supply before subsequently re-cultured in fresh LB medium containing ofloxacin (5  $\mu\text{g/ml}$ ) or ampicillin (200  $\mu\text{g/ml}$ ). The survival rates were calculated as: [colony-forming units of the antibiotic-treated cells] / [colony-forming units of the antibiotic-untreated cells]  $\times 100$ .

635

636

(E) Survival rates of the late stationary-phase wild-type (control), *nuoA*- or *sdhC*-knockdown cells that were re-cultured in fresh LB medium containing the indicated antibiotics. Again, a non-targeting crRNA was transcribed from a plasmid in the control cells.

637

638

The symbol ' \* ' in all the above panels indicates a significant difference between the compared pair of samples ( $P$ -value  $< 0.01$ ,  $t$ -test). At least three replicates were performed for each measurement.

639

640

(F) Live-cell fluorescence (top) or bright field (bottom) microscopic images of the late stationary-phase *ftsZ-mNeonGreen* cells that were re-cultured at 37 °C in fresh ampicillin-containing LB medium to the indicated time points. The re-growing cells (which were eventually lysed after a swelling, thus became invisible at a certain time point) and non-growing cells (which maintained their sizes unaltered and quiescent bodies intact all through the re-culturing process) are indicated by the white and red circles, respectively. Scale bars, 1  $\mu\text{m}$ .

641

642

643

644

645

646

647

648

649

650

651

652

653

## 654 Discussion

655

656

657

658

Here, we accidentally discovered a new reversible subcellular structure that termed as the quiescent body in *E. coli* cells. This structure is formed only in

659

660

661 non-growing/non-dividing late stationary-phase cells and initiates to dissolve when  
662 the cells re-grow/re-divide in fresh culture medium. We suppose that such a novel  
663 structure is also similarly formed in other bacterial species. In retrospect, these  
664 findings were made apparently as a result of our unique approach, *in vivo* protein  
665 photo-crosslinking in combination with live-cell imaging, as well as our focusing on  
666 the unique FtsZ protein, which assembles into the Z-ring structure.

667 Our major observations can be briefly summarized as follows. First, *in vivo*  
668 protein photo-crosslinking analysis revealed that the FtsZ protein, although exists as  
669 homo-oligomers in actively dividing log-phase cells, dissociates into monomers,  
670 which interacts with other proteins and was detected in the pellet fraction of  
671 non-dividing late stationary-phase cells (**Fig. 1**). Second, live-cell imaging analysis  
672 confirmed that the FtsZ protein indeed no longer exists as the Z-ring structure, but  
673 meanwhile unveiled that it exists in two cell-pole granules in each late  
674 stationary-phase cell (**Fig. 2**). Third, mass spectrometry analysis revealed that such  
675 cell-pole granules selectively sequester proteins (including FtsZ) that are vital for cell  
676 growth and division (**Fig. 3**), and we thus named them as quiescent bodies. Fourth,  
677 further live-cell imaging analysis of cells cultured to different time points showed that  
678 the quiescent bodies are gradually formed in a highly heterogeneous manner among  
679 individual cells (**Fig. 4**). Fifth, we demonstrated that the formation of quiescent bodies  
680 can be effectively induced in log-phase cells that were placed in the late  
681 stationary-phase culture medium or were treated with indole (**Fig. 5**). Sixth, gene  
682 knockdown (and knockout) studies in combination with live-cell imaging analysis  
683 indicated that the formation of quiescent bodies relies on the operation of cellular  
684 respiration (**Fig. 6**). Seventh, live-cell imaging in combination with *in vivo* protein  
685 photo-crosslinking analysis demonstrated that when the non-dividing/non-growing  
686 cells were re-cultured in fresh medium, quiescent bodies can be dissolved  
687 independent on protein biosynthesis, also in a heterogeneous manner among  
688 individual cells, allowing the released proteins to resume their functions (**Fig. 7**).  
689 Eighth, our analysis on the average re-division initial doubling time (re-division  $T_{id}$   
690 values) as well as the survival rate towards antibiotic treatments demonstrated that the  
691 degree of quiescent body formation is highly correlated with the duration of lag time  
692 for the non-growing bacterial cells to recover (**Fig. 8**).

693 One major implication of these findings is that the quiescent body apparently  
694 functions as a biological timer for a non-growing bacterial cell to resume growth, as  
695 indicated by the following observations. First, quiescent body formation among  
696 individual cells appears to be highly heterogeneous such that it begins at different  
697 time points in different cells and that it takes multiple stages for their maturation in  
698 each cell during the culturing (**Fig. 4**). Second, the dissolution of quiescent bodies  
699 also occurs in a highly heterogeneous manner among individual cells such that it  
700 occurs in some cells at a very early time point while remain intact in some others even  
701 at a very late time point during the re-culturing (**Fig. 7A**). Third, the duration of lag  
702 time for the re-culturing is strongly correlated to the degree of quiescent body

703 formation such that the re-division  $T_{id}$  value is higher for cells that are derived from a  
704 later stage of the stationary phase (Fig. 8A). The role of quiescent body as a  
705 biological timer for bacterial cell growth resumption is apparently reflected as such  
706 that the initiation of the dissolution of “younger” quiescent bodies occurs more  
707 efficiently and thus takes less time, while that of the “older” ones occurs less  
708 efficiently and thus takes longer time. In other words, the differential formation and  
709 dissolution of quiescent bodies in individual cells may follow a “last-in-first-out (or  
710 first-in-last-out)” rule<sup>48</sup>. The heterogeneous forming and dissolving processes of  
711 quiescent bodies are schematically illustrated in Fig. 9.

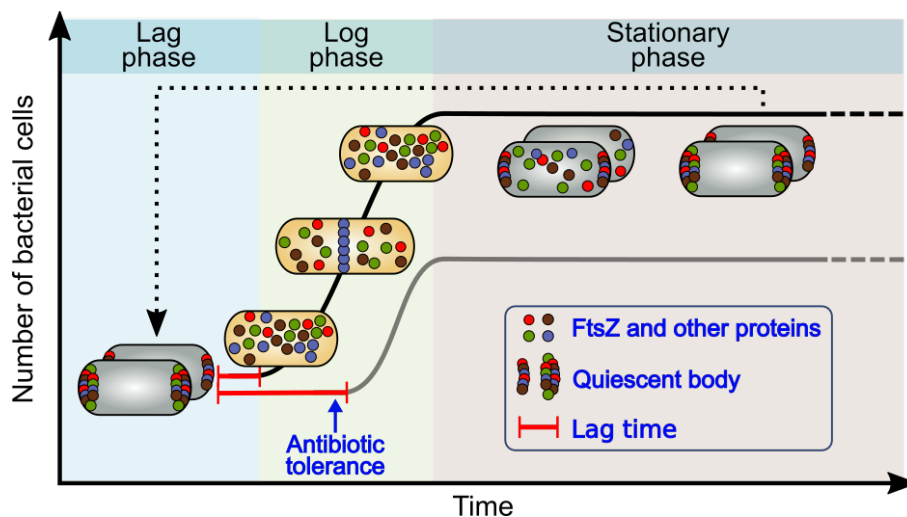

712

713 **Figure 9. The quiescent body, that is formed in the non-growing stationary phase bacterial**  
714 **cells and is dissolved in the recovering cells, functions as a biological timer for non-growing**  
715 **bacterial cells to resume growth.**

716

717 It has long been recognized that when bacteria are cultured in the laboratory, there  
718 always exists a lag phase, in which cell growth is hardly appreciable before the cells  
719 resume their growth from the non-growing state<sup>6</sup>. The status of the cells in this lag  
720 phase remains poorly understood mainly due to their lack of metabolic activities. Our  
721 discoveries reported here for the first time unveiled the occurrence of such a key  
722 cellular event as the initiation of the dissolution of quiescent bodies in this unique  
723 recovering stage of the bacterial cells. Their dissolution apparently does not rely on  
724 new protein synthesis, thus qualifies as an early event for non-growing bacterial cells  
725 to recover. By the same token, given that multiple proteins essential for cell growth  
726 and division are largely sequestered in the quiescent bodies, their formation probably  
727 locks the cells in a non-growing state. It follows that the dissolution of quiescent  
728 bodies and the release of these key proteins represent a major barrier that the cells  
729 have to overcome during the lag phase before they can initiate their re-growing  
730 process.

731 The heterogeneous nature of quiescent body formation and dissolution among  
732 individual cells, that would in turn generate a heterogeneity in the duration of lag time  
733 taken by individual cells before their recovery, might provide a bet-hedging strategy

734 for the survival of the bacterial species<sup>12,49,50</sup>. Specifically, due to such heterogeneities,  
735 under any particular environmental condition, only a certain portion of the  
736 non-growing cells would initiate the dissolution of their quiescent bodies and thus  
737 resume their growth. Such recovered cells, though may generate more offspring if the  
738 condition is optimal, would become vulnerable and might be killed if the condition  
739 suddenly becomes adverse again. By contrast, those cells that maintain their quiescent  
740 bodies and thus remain non-growing, although not to contribute to any offspring,  
741 would be highly tolerant towards the adverse conditions and thus important for  
742 preventing the species from becoming extinct.

743 It has been long recognized that the dormant (persister) cells exist in an extremely  
744 low number and possess an appearance hardly distinguishable from the non-dormant  
745 (non-persister) ones in the bacterial cell population<sup>2,51</sup>. These obstacles have  
746 prevented an effective investigation on them before we can find a feasible way to  
747 eradicate them. In view of our findings reported here, we suppose that the formation  
748 of quiescent bodies is a far more reliable distinguishable feature for defining dormant  
749 (persister) bacterial cells, in comparison with the commonly described  
750 non-growing/non-dividing feature<sup>2,3</sup>. We observed in this study that the wild-type  
751 cells cultured to 12 h or the *sdhC*-knockdown cells cultured to 24 h, both of which do  
752 not possess quiescent bodies although in a non-growing/non-dividing state, are able to  
753 re-grow and re-divide immediately without displaying a lag time, when placed in  
754 fresh LB medium (**Figs. 8A** and **8C**, respectively). This implicate that the  
755 non-growing/non-dividing feature is not a reliable one for defining dormant (persister)  
756 bacterial cells. Additionally, it has been commonly believed that many bacterial  
757 species collected from the natural environment exist in a “viable but non-culturable”  
758 state<sup>52,53</sup>. It is certainly worth future investigation to find out whether the presence of  
759 quiescent bodies is also a common and distinguishing feature of such  
760 non-growing/non-dividing bacterial cells.

761 Much needs to be further clarified on the biology of quiescent bodies. For  
762 example, first, what is the chemical composition of the quiescent body and what other  
763 molecules are present in addition to the proteins we identified? Second, how the  
764 chemical components in the quiescent bodies are organized? Third, what is (are) the  
765 key signal molecule (s) that directly trigger their formation in the stationary-phase  
766 cells and how such signals are sensed by the cells to initiate the molecular events  
767 leading to their formation? Fourth, why is the operation of cellular respiration  
768 essential for their formation? Fifth, how are the proteins sequestered in them  
769 specifically selected? Sixth, what signals trigger the initiation of their dissolution  
770 when the cells are exposed to growth-permissive conditions and what are the  
771 molecular events leading to their dissolution? Last but not least, we need to find out  
772 whether a similar structure is present in eukaryotic cells.

773

774

775 **METHODS**



776 **Bacterial strains, plasmids and genome modifications.** Phenotypes of the bacterial  
777 strains, all derived from the *E. coli* BW25113 strain, are listed in **Table S1**. The  
778 plasmids used in this study are all listed in **Table S2**. All the genomic modifications  
779 (to generate the *ftsZ-mNeonGreen*, *ftsZ-Avi*,  $\Delta nuoAB$ , or  $\Delta sdhCDAB$  strain) were  
800 –red genomic recombination system<sup>54</sup>. All the newly generated plasmids and  
801  
802 genomic modifications were confirmed by DNA sequencing.

803 **Bacterial cell culturing.** Luria Bertani (LB) liquid (10 g/l tryptone, 5 g/l yeast extract  
804 and 5 g/l NaCl) or agar-containing solid culture medium was sterilized by autoclaving.  
805 g/ml ampicillin was added to the culture medium. Log-phase and late  
883  
884 stationary-phase cells refer to those that were cultured at 37°C in test tubes shaking at  
885 260 r.p.m for 6 h and 24 h, respectively, after the overnight-cultured cells were  
886 diluted 100-fold dilution in LB fresh medium.

887 **In vivo protein photo-crosslinking of the pBpa variants of FtsZ.** This is performed  
888 by using a *ftsZ* conditional knockout strain, named as LY928- $\Delta ftsZ$  (pJSB100), which  
889 we constructed based on the LY928 strain whose genome contains the genes encoding  
890 the orthogonal amino acyl-tRNA and tRNA, both needed for incorporating unnatural  
891 amino acid pBpa<sup>22</sup>, as we described earlier (22). In the LY928- $\Delta ftsZ$  (pJSB100) strain,  
892 the wild-type FtsZ protein is expressed from the pJSB100 plasmid upon arabinose  
893 induction<sup>55</sup>. For analyzing complementation capacity of a certain pBpa variant of  
894 FtsZ, another plasmid that constitutively expressing it was transformed into the  
1895 LY928- $\Delta ftsZ$  (pJSB100) strain. Such transformed cells were then cultured in parallel  
1896 g/ml ampicillin and 0.05% arabinose) and in the so-called glucose repression medium  
1008 M pBpa). A variant was considered to be complement the wild-type FtsZ if the  
1117 transformed cells were able to grow not only in the induction medium but also in the  
1118 repression medium (to be non-complement if only to grow in the former, not in the  
1119 latter). For performing the photo-crosslinking analysis, each pBpa variant of FtsZ was  
1120 expressed in the self-constructed LY928-*ftsZ*-*Avi* strain (in which an *Avi* Tag was  
1121 fused to the C-terminus of the endogenous wild type FtsZ protein), and the cells were  
1122 M pBpa. The cells were then irradiated with UV light (365 nm) for 10 min at room  
1211 temperature by using a Hoefer UVC 500 Crosslinker (Amersham Biosciences) and  
1212 collected by centrifugation at 13,000 × *g* before subjecting to blotting analysis.  
1213

1214 **Fluorescence microscopic imaging.** Cell or cell lysate samples were dropped onto a  
1215 glass dish (NEST biotechnology, USA) and covered with agar before micrographs  
1216 were acquired at 37°C (for the re-culturing cell samples) or at 30°C (for all other  
1217 samples) with an N-SIM imaging system (Nikon) by using the 2D-SIM mode, with a  
1218 100×/1.49 NA oil-immersion objective (Nikon) and being excited by a 488 nm or 561  
1219 nm laser beam. The 3D images were acquired with an N-SIM and a Deltavision OMX  
1220 SR (GE Healthcare) imaging system by using the 3D mode. The samples were  
1221 sectioned at the Z-axis every 120 nm or 240 nm. The images were further  
1222 reconstructed by using the NIS-Elements AR 4.20.00 (Nikon) and the Imaris software



1223 before further processed with the GNU image manipulation program. The oblate is  
1224 calculated using the Imaris software. At least 4 images were taken and more than 50  
1225 bacterial cells were examined for each experiment. All experiments were  
1226 independently repeated for at least 3 times.

1227 **Cellular fraction separation.** The late stationary-phase *E. coli* cells were prepared by  
1228 growing the cells at 37°C (shaking at 260 r.p.m.) for 24 h after the overnight-cultured  
1229 cells were diluted 100-fold into fresh LB medium. The cell samples in re-culturing  
1230 experiments (as shown in **Fig. 7B, 7E**) were prepared by transferring the 2-fold  
1231 diluted late stationary-phase cells into fresh LB medium in the absence or presence of  
1253 g/ml) and further cultured at 37°C (shaking at 260 r.p.m.) to a particular indicated  
1254 time point. The cells were then collected by centrifugation ( $8000 \times g$ ) and disrupted  
1255 by a French press at 1000 MPa before centrifuged at  $13,000 \times g$  to separate the  
1256 supernatant and pellet.

1257 **Blotting analysis.** The samples including cell lysate, supernatant fraction, pellet  
1258 fraction and the cells irradiated to UV were each added into the sample buffer, boiled  
1259 and analyzed by tricine SDS-PAGE, or further probed with the indicated antibodies or  
1260 streptavidin-AP conjugate for blotting analysis. The visualized protein bands on gels  
1261 were scanned and processed using the GNU image manipulation program.

1262 **CRISPRi experiments.** These were performed according to previously reported  
1263 methods<sup>45</sup>. Briefly, plasmids carrying the crRNA that targets the *nuoA* or *sdhC* gene  
1264 were transformed into the *E. coli* cells in which the proteins for recognizing and  
1265 binding specific DNA sequences are expressed from the Cascade operon and the gene  
1266 (*cas3* gene) encoding the protein that cleaves the target sequence was deleted. The  
1267 designed DNA sequences for knocking down the *nuoA* and the *sdhC* genes were  
1268 ATAGCGAATGCCAGTGATGAGCGATGACTTC and  
1269 AATGTGAAAAACAAAGACCTGTTAATCTGGA, respectively. The control  
1270 plasmid carried a non-targeting crRNA sequence CTGCTGGAGCTGGCTG  
1271 CAAGGCAAGCCGCCCA. The crRNAs on the plasmids are transcribed  
1272 constitutively, rather being induced.

1273 **Cell re-growth and calculation of the average initial doubling time upon**  
1274 **re-division (re-division  $T_{id}$ ).** Log-phase or late stationary-phase cells of a particular  
1275 type were diluted 40-fold into fresh LB medium and cultured at 37°C with shaking  
1276 (260 r.p.m.). Growth curves were prepared by measuring the OD<sub>600</sub> value of the  
1277 cultured cells at 30 min intervals. The re-division  $T_{id}$  value was calculated as  $30 /$   
1278  $\log_2^{N_{t1}/N_{t0}}$  min, where  $N_{t0}$  and  $N_{t1}$  are the number of cells at 0 min and 30 min,  
1279 respectively. The  $N_{t1}/N_{t0}$  ratio for each batch of cultured cells was calculated based on  
1280 the increase in optical density at 600 nm (the correlation between the cell number and  
1281 the OD<sub>600</sub> value was determined by preparing a standard curve).

1282 **Assay for cell survival after antibiotic treatment.** Late stationary-phase cells or  
1283 indole-induced log-phase cells were diluted 40-fold into fresh LB medium containing  
1318 g/ml ampicillin and incubated at 37°C with shaking (260 r.p.m.) for 2 h. The cells  
1319 were then collected by centrifugation (to remove the culture medium and the  
1320 antibiotics), re-suspended in phosphate-buffered saline (PBS) and serially diluted in  
1321 PBS before being spotted on LB agar plates for Colony Formation Unit (CFU)  
1322 counting. The cell survival rate was calculated as: [number of colonies formed after  
1323 antibiotics treatment] / [number of colonies formed without antibiotic  
1324 treatment] ×100.

1325

### 1326 **Acknowledgments**

1327

1328 We thank Harold P. Erickson (Duke University, USA) for kindly providing us the  
1329 plasmid pJSB100 and Peter G. Schultz (The Scripps Research Institute, USA) for  
1330 providing us the plasmids carrying genes encoding the orthogonal tRNA and amino  
1331 acyl-tRNA for incorporating pBpa into target proteins. We thank Keio Collections for  
1332 providing us the wild-type *E. coli* strain. We thank the Core Facilities at the School of  
1333 Life Sciences, Peking University, for assistance in using the structured illumination  
1334 microscopy (SIM), and we are grateful to Drs. Chunyan Shan and Xiaochen Li for  
1335 their kind help in performing the fluorescence microscopic imaging analysis. We  
1336 thank Dr. Wen Zhou at the Mass Spectrometry Facility of the National Center for  
1337 Protein Sciences at Peking University for assistance in performing the mass  
1338 spectrometry analysis. We thank Prof. Xinmiao Fu from Fujian Normal University for  
1339 useful discussions. This work was supported by funds from the National Natural  
1340 Science Foundation of China (No. 31670775 and 31470766 to ZYC), the National  
1341 Basic Research Program of China (No. 2012CB917300 to ZYC) and Qidong-SLS  
1342 Innovation Fund.

### 1343 **Author Contributions**

1344 Jiayu Yu and Yang Liu designed and performed the experiments, analyzed the  
1345 data and drafted the manuscript. Prof. Zengyi Chang supervised this study and edited  
1346 the manuscript.

### 1347 **Conflict of Interest**

1348 We declare that we have no conflicts of interest related to this work.

1349

1350

### 1351 **References**

- 1352 1. Bigger, J. TREATMENT OF STAPHYLOCOCCAL INFECTIONS WITH  
1353 PENICILLIN BY INTERMITTENT STERILISATION. *The Lancet* **244**, 497–500  
1354 (1944).
- 1355 2. Burke, V., Sprague, A. & Barnes, L. V. Dormancy In Bacteria. *J. Infect. Dis.* **36**,  
1356 555–560 (1925).
- 1357 3. Lewis, K. Persister cells, dormancy and infectious disease. *Nat. Rev. Microbiol.* **5**,  
1358 48–56 (2007).
- 1359 4. Levin-Reisman, I. *et al.* Automated imaging with ScanLag reveals previously  
1360 undetectable bacterial growth phenotypes. *Nat. Methods* **7**, 737–739 (2010).
- 1361 5. Monod, J. The Growth of Bacterial Cultures. *Annu. Rev. Microbiol.* **3**, 371–394  
1362 (1949).
- 1363 6. Penfold, W. J. On the Nature of Bacterial Lag. *J. Hyg. (Lond.)* **14**, 215–241 (1914).
- 1364 7. Hathaway, L. J. *et al.* Capsule type of *Streptococcus pneumoniae* determines  
1365 growth phenotype. *PLoS Pathog.* **8**, e1002574 (2012).
- 1366 8. Frimodt-Møller, N., Sebbesen, O. & Frølund Thomsen, V. The pneumococcus and  
1367 the mouse protection test: importance of the lag phase in vivo. *Chemotherapy* **29**,  
1368 128–134 (1983).
- 1369 9. Bättig, P., Hathaway, L. J., Hofer, S. & Mühlemann, K. Serotype-specific  
1370 invasiveness and colonization prevalence in *Streptococcus pneumoniae* correlate with  
1371 the lag phase during in vitro growth. *Microbes Infect.* **8**, 2612–2617 (2006).
- 1372 10. Brauner, A., Fridman, O., Gefen, O. & Balaban, N. Q. Distinguishing between  
1373 resistance, tolerance and persistence to antibiotic treatment. *Nat. Rev. Microbiol.* **14**,  
1374 320–330 (2016).
- 1375 11. Levin-Reisman, I. *et al.* Antibiotic tolerance facilitates the evolution of resistance.  
1376 *Science* eaaj2191 (2017). doi:10.1126/science.aaj2191
- 1377 12. Fridman, O., Goldberg, A., Ronin, I., Shoresh, N. & Balaban, N. Q. Optimization  
1378 of lag time underlies antibiotic tolerance in evolved bacterial populations. *Nature* **513**,  
1379 418–421 (2014).
- 1380 13. Dai, K. & Lutkenhaus, J. *ftsZ* is an essential cell division gene in *Escherichia coli*.  
1381 *J. Bacteriol.* **173**, 3500–3506 (1991).
- 1382 14. Erickson, H. P. Atomic structures of tubulin and FtsZ. *Trends Cell Biol.* **8**,  
1383 133–137 (1998).
- 1384 15. Erickson, H. P., Taylor, D. W., Taylor, K. A. & Bramhill, D. Bacterial cell division  
1385 protein FtsZ assembles into protofilament sheets and minirings, structural homologs of  
1386 tubulin polymers. *Proc. Natl. Acad. Sci. U. S. A.* **93**, 519–523 (1996).
- 1387 16. Mukherjee, A. & Lutkenhaus, J. Analysis of FtsZ Assembly by Light Scattering  
1388 and Determination of the Role of Divalent Metal Cations. *J. Bacteriol.* **181**, 823–832  
1389 (1999).
- 1390 17. Erickson, H. P., Anderson, D. E. & Osawa, M. FtsZ in Bacterial Cytokinesis:  
1391 Cytoskeleton and Force Generator All in One. *Microbiol. Mol. Biol. Rev.* **74**, 504–528  
1392 (2010).

- 1393 18. Romberg, L. & Levin, P. A. Assembly Dynamics of the Bacterial Cell Division  
1394 Protein FtsZ: Poised at the Edge of Stability. *Annu. Rev. Microbiol.* **57**, 125–154  
1395 (2003).
- 1396 19. Matsui, T. *et al.* Structural reorganization of the bacterial cell-division protein FtsZ  
1397 from *Staphylococcus aureus*. *Acta Crystallogr. D Biol. Crystallogr.* **68**, 1175–1188  
1398 (2012).
- 1399 20. Oliva, M. A., Cordell, S. C. & Löwe, J. Structural insights into FtsZ protofilament  
1400 formation. *Nat. Struct. Mol. Biol.* **11**, 1243–1250 (2004).
- 1401 21. Chin, J. W., Martin, A. B., King, D. S., Wang, L. & Schultz, P. G. Addition of a  
1402 photocrosslinking amino acid to the genetic code of *Escherichiacoli*. *Proc. Natl. Acad.*  
1403 *Sci. U. S. A.* **99**, 11020–11024 (2002).
- 1404 22. Ryu, Y. & Schultz, P. G. Efficient incorporation of unnatural amino acids into  
1405 proteins in *Escherichia coli*. *Nat. Methods* **3**, 263–265 (2006).
- 1406 23. Fu, X., Shi, X., Yan, L., Zhang, H. & Chang, Z. In Vivo Substrate Diversity and  
1407 Preference of Small Heat Shock Protein IbpB as Revealed by Using a Genetically  
1408 Incorporated Photo-cross-linker. *J. Biol. Chem.* **288**, 31646–31654 (2013).
- 1409 24. Wang, Y. *et al.* A Supercomplex Spanning the Inner and Outer Membranes  
1410 Mediates the Biogenesis of  $\beta$ -Barrel Outer Membrane Proteins in Bacteria. *J. Biol.*  
1411 *Chem.* **291**, 16720–16729 (2016).
- 1412 25. Zhang, M. *et al.* A genetically incorporated crosslinker reveals chaperone  
1413 cooperation in acid resistance. *Nat. Chem. Biol.* **7**, 671–677 (2011).
- 1414 26. Li, Y. *et al.* FtsZ protofilaments use a hinge-opening mechanism for constrictive  
1415 force generation. *Science* **341**, 392–395 (2013).
- 1416 27. Ma, X., Ehrhardt, D. W. & Margolin, W. Colocalization of cell division proteins  
1417 FtsZ and FtsA to cytoskeletal structures in living *Escherichia coli* cells by using green  
1418 fluorescent protein. *Proc. Natl. Acad. Sci. U. S. A.* **93**, 12998–13003 (1996).
- 1419 28. Rinas, U. *et al.* Bacterial Inclusion Bodies: Discovering Their Better Half. *Trends*  
1420 *Biochem. Sci.* (2017). doi:10.1016/j.tibs.2017.01.005
- 1421 29. Verhoeven, G. S., Dogterom, M. & den Blaauwen, T. Absence of long-range  
1422 diffusion of OmpA in *E. coli* is not caused by its peptidoglycan binding domain. *BMC*  
1423 *Microbiol.* **13**, 66 (2013).
- 1424 30. Harvey, B. R. *et al.* Anchored periplasmic expression, a versatile technology for  
1425 the isolation of high-affinity antibodies from *Escherichia coli*-expressed libraries. *Proc.*  
1426 *Natl. Acad. Sci. U. S. A.* **101**, 9193–9198 (2004).
- 1427 31. Kwiatkowska, J., Matuszewska, E., Kuczyńska-Wiśnik, D. & Laskowska, E.  
1428 Aggregation of *Escherichia coli* proteins during stationary phase depends on glucose  
1429 and oxygen availability. *Res. Microbiol.* **159**, 651–657 (2008).
- 1430 32. Mukherjee, A. & Lutkenhaus, J. Purification, assembly, and localization of FtsZ.  
1431 *Methods Enzymol.* **298**, 296–305 (1998).
- 1432 33. Mori, H. & Ito, K. Different modes of SecY-SecA interactions revealed by  
1433 site-directed in vivo photo-cross-linking. *Proc. Natl. Acad. Sci. U. S. A.* **103**,  
1434 16159–16164 (2006).

- 1435 34. Löwe, J. & Amos, L. A. Crystal structure of the bacterial cell-division protein FtsZ.  
1436 *Nature* **391**, 203–206 (1998).
- 1437 35. Durand-Heredia, J. M., Yu, H. H., De Carlo, S., Lesser, C. F. & Janakiraman, A.  
1438 Identification and Characterization of ZapC, a Stabilizer of the FtsZ Ring in  
1439 *Escherichia coli*. *J. Bacteriol.* **193**, 1405–1413 (2011).
- 1440 36. Ghigo, J. M. & Beckwith, J. Cell division in *Escherichia coli*: role of FtsL domains  
1441 in septal localization, function, and oligomerization. *J. Bacteriol.* **182**, 116–129 (2000).
- 1442 37. Zhou, Y. & Gottesman, S. Regulation of Proteolysis of the Stationary-Phase Sigma  
1443 Factor RpoS. *J. Bacteriol.* **180**, 1154–1158 (1998).
- 1444 38. Waters, C. M. & Bassler, B. L. Quorum sensing: cell-to-cell communication in  
1445 bacteria. *Annu. Rev. Cell Dev. Biol.* **21**, 319–346 (2005).
- 1446 39. Sezonov, G., Joseleau-Petit, D. & D’Ari, R. *Escherichia coli* Physiology in  
1447 Luria-Bertani Broth. *J. Bacteriol.* **189**, 8746–8749 (2007).
- 1448 40. Gaimster, H. & Summers, D. Regulation of Indole Signalling during the Transition  
1449 of *E. coli* from Exponential to Stationary Phase. *PLOS ONE* **10**, e0136691 (2015).
- 1450 41. Wolfe, A. J. The Acetate Switch. *Microbiol. Mol. Biol. Rev.* **69**, 12–50 (2005).
- 1451 42. Hopkins, F. G. & Cole, S. W. A contribution to the chemistry of proteids. *J.*  
1452 *Physiol.* **29**, 451–466 (1903).
- 1453 43. Chimere, C., Murray, A. J., Oldewurtel, E. R., Summers, D. K. & Keyser, U. F.  
1454 The Effect of Bacterial Signal Indole on the Electrical Properties of Lipid Membranes.  
1455 *ChemPhysChem* **14**, 417–423 (2013).
- 1456 44. Basan, M. *et al.* Overflow metabolism in *Escherichia coli* results from efficient  
1457 proteome allocation. *Nature* **528**, 99–104 (2015).
- 1458 45. Luo, M. L., Mullis, A. S., Leenay, R. T. & Beisel, C. L. Repurposing endogenous  
1459 type I CRISPR-Cas systems for programmable gene repression. *Nucleic Acids Res.* **43**,  
1460 674–681 (2015).
- 1461 46. Novick, A. Growth of Bacteria. *Annu. Rev. Microbiol.* **9**, 97–110 (1955).
- 1462 47. Wolfe, A. D. & Hahn, F. E. Mode of action of chloramphenicol IX. Effects of  
1463 chloramphenicol upon a ribosomal amino acid polymerization system and its binding  
1464 to bacterial ribosome. *Biochim. Biophys. Acta BBA - Nucleic Acids Protein Synth.* **95**,  
1465 146–155 (1965).
- 1466 48. Jöers, A. & Tenson, T. Growth resumption from stationary phase reveals memory  
1467 in *Escherichia coli* cultures. *Sci. Rep.* **6**, srep24055 (2016).
- 1468 49. Balaban, N. Q. Persistence: mechanisms for triggering and enhancing phenotypic  
1469 variability. *Curr. Opin. Genet. Dev.* **21**, 768–775 (2011).
- 1470 50. Beaumont, H. J. E., Gallie, J., Kost, C., Ferguson, G. C. & Rainey, P. B.  
1471 Experimental evolution of bet hedging. *Nature* **462**, 90–93 (2009).
- 1472 51. Lewis, K. Persister Cells. *Annu. Rev. Microbiol.* **64**, 357–372 (2010).
- 1473 52. Xu, H. S. *et al.* Survival and viability of nonculturable *Escherichia coli* and *Vibrio*  
1474 *cholerae* in the estuarine and marine environment. *Microb. Ecol.* **8**, 313–323 (1982).

- 1475 53. Li, L., Mendis, N., Trigui, H., Oliver, J. D. & Faucher, S. P. The importance of the  
1476 viable but non-culturable state in human bacterial pathogens. *Front. Microbiol.* **5**, 258  
1477 (2014).
- 1478 54. Lee, D. J. *et al.* Gene doctoring: a method for recombineering in laboratory and  
1479 pathogenic *Escherichia coli* strains. *BMC Microbiol.* **9**, 252 (2009).
- 1480 55. Stricker, J. & Erickson, H. P. In Vivo Characterization of *Escherichia coli* ftsZ  
1481 Mutants: Effects on Z-Ring Structure and Function. *J. Bacteriol.* **185**, 4796–4805  
1482 (2003).
- 1483
